# Supplementary material
Source: bioRxiv or medRxiv preprint supplement (https://www.biorxiv.org/highwire/filestream/21614/field_highwire_adjunct_files/0/078246-1.pdf)
Supplement: Supplementary file [file 078246-1.pdf]

## VIII. SUPPLEMENTARY INFORMATION

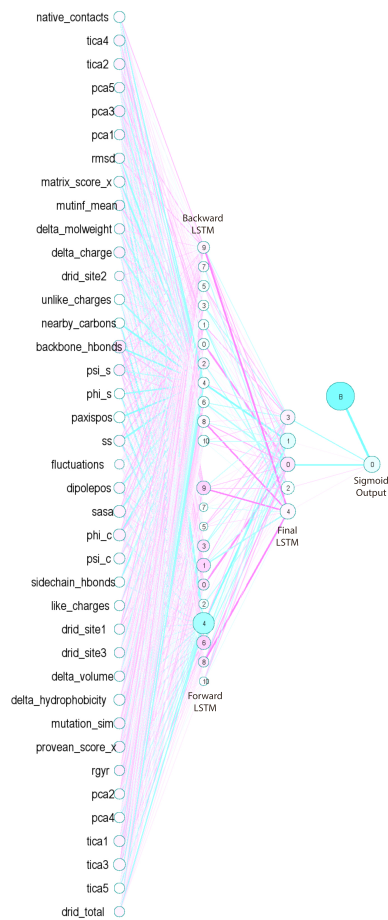

Fig. 13. Extended NID model applied to our bidirectional LSTM model.

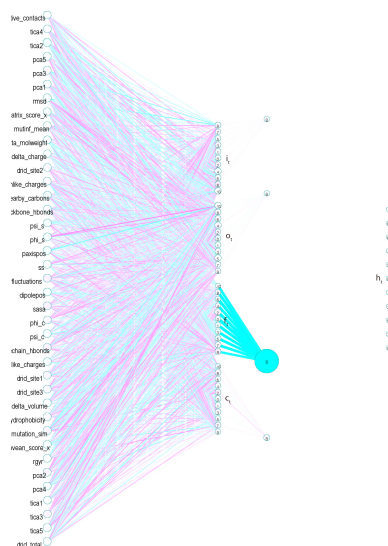Fig. 14. LSTM NID for the feed-forward connections of the LSTM *forward* LSTM in figure VIII.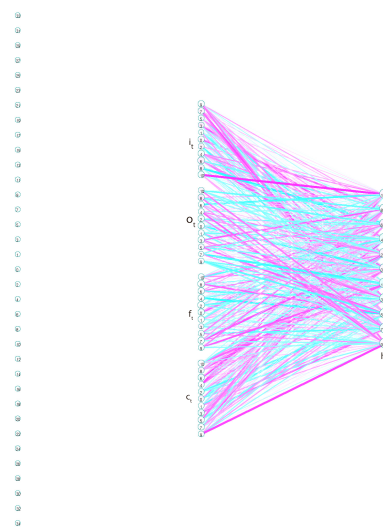Fig. 15. LSTM NID for the recurrent connections of the LSTM *forward* LSTM in figures VIII and VIII.

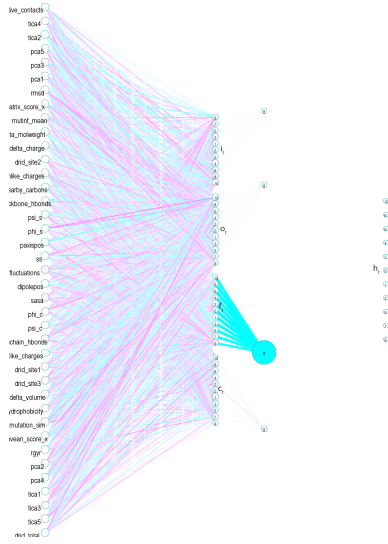

Fig. 16. LSTM NID for the feed-forward connections of the LSTM *backward LSTM* in figures VIII.

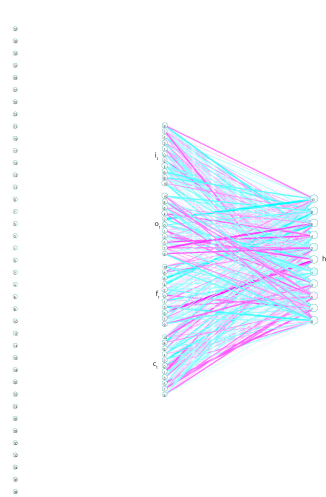

Fig. 17. LSTM NID for the recurrent connections of the LSTM *backward LSTM* in figures VIII and VIII.

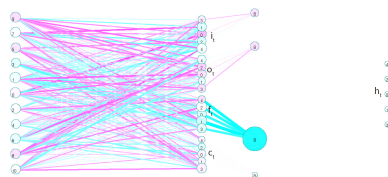

Fig. 18. LSTM NID for the feed-forward connections of the LSTM *Final LSTM* in figures VIII.

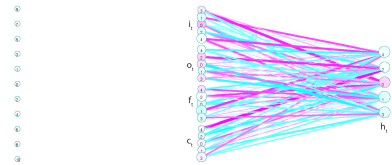

Fig. 19. LSTM NID for the recurrent connections of the LSTM *Final LSTM* in figures VIII and figure VIII.
